# Supplementary material for: A Frame Work for Embedded System Management
Source: JCI journal article supplement (doi:10.1172/jci.insight.88032), 2002-06-24
Supplement: sd1 [file 1]

**BET inhibitors block pancreatic stellate cell collagen I production and attenuate fibrosis  
in vivo**

Krishan Kumar<sup>1,\*</sup>, Brian T. DeCant<sup>1</sup>, Paul J. Grippo<sup>2</sup>, Rosa F. Hwang<sup>3</sup>, David J. Bentrem<sup>4,5,6</sup>,  
Kazumi Ebine<sup>1</sup>, and Hidayatullah G. Munshi<sup>1,4,5,6\*</sup>

<sup>1</sup>Department of Medicine, Feinberg School of Medicine, Northwestern University, Chicago, IL, USA; <sup>2</sup>Department of Medicine, University of Illinois, Chicago, IL, USA; <sup>3</sup>Department of Surgical Oncology, The University of Texas MD Anderson Cancer Center, Houston, TX, USA;

<sup>4</sup>Department of Surgery, Feinberg School of Medicine, Northwestern University, Chicago, IL, USA; <sup>5</sup>Jesse Brown VA Medical Center, Chicago, IL, USA; <sup>6</sup>The Robert H. Lurie Comprehensive Cancer Center, Chicago, IL, USA.

**SUPPLEMENTAL DATA**

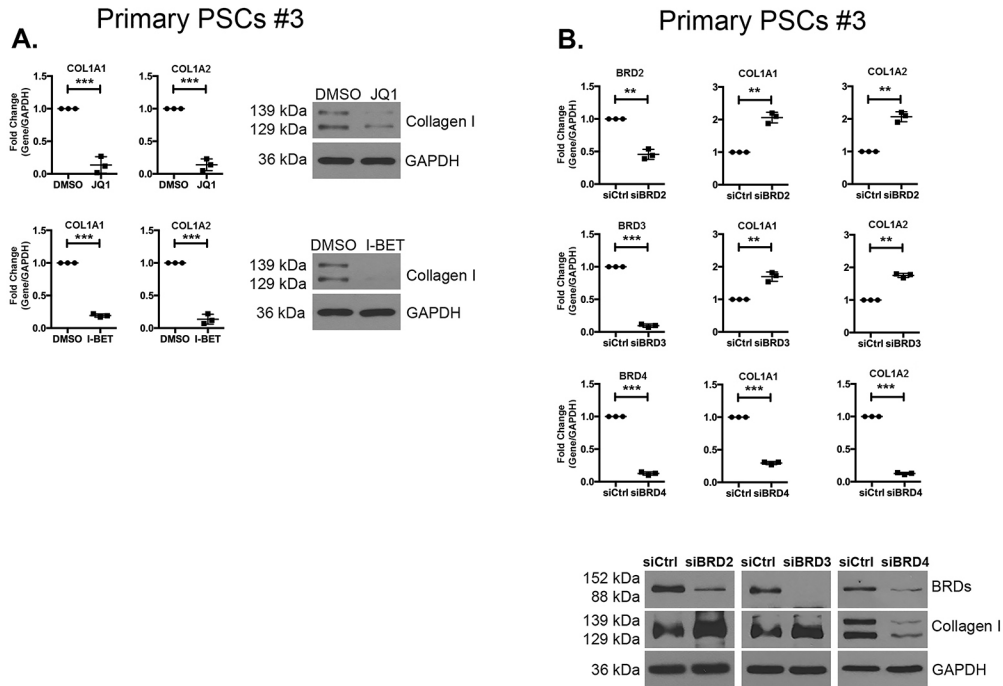

**Supplemental Figure 1: BET inhibitors and BRD4 knockdown decrease collagen I production by primary PSCs isolated from human PDAC tumors.** (A) Early passage primary PSCs, which were isolated from a de-identified human PDAC specimen (Tumor #3) using the outgrowth assay, were treated with the BET inhibitors JQ1 (1  $\mu$ M) and I-BET151 (1  $\mu$ M). The effects on *COL1A1* and *COL1A2* mRNAs were determined by qRT-PCR (n=3). \*\*\* $P$  < 0.001. Data were analyzed by two-tailed unpaired Student's  $t$  test. The effects on collagen I protein expression were determined by Western blotting. These results are representative of three (n=3) independent experiments. (B) Primary cancer-associated PSCs isolated from a human PDAC specimen (Tumor #3) were transfected with control siRNA or with siRNAs against BRD2, BRD3 or BRD4. The effects on the individual *BRD* mRNAs and *COL1A1* and *COL1A2* mRNAs were determined by qRT-PCR (n=3). \*\* $P$  < 0.01, \*\*\* $P$  < 0.001. Data were analyzed by two-tailed unpaired Student's  $t$  test. The effects on individual BRD proteins and collagen I protein expression were determined by Western blotting. These results are representative of three (n=3) independent experiments. BET, bromodomains and extra-terminal; COL, collagen; PDAC, pancreatic ductal adenocarcinoma; PSCs, pancreatic stellate cells.

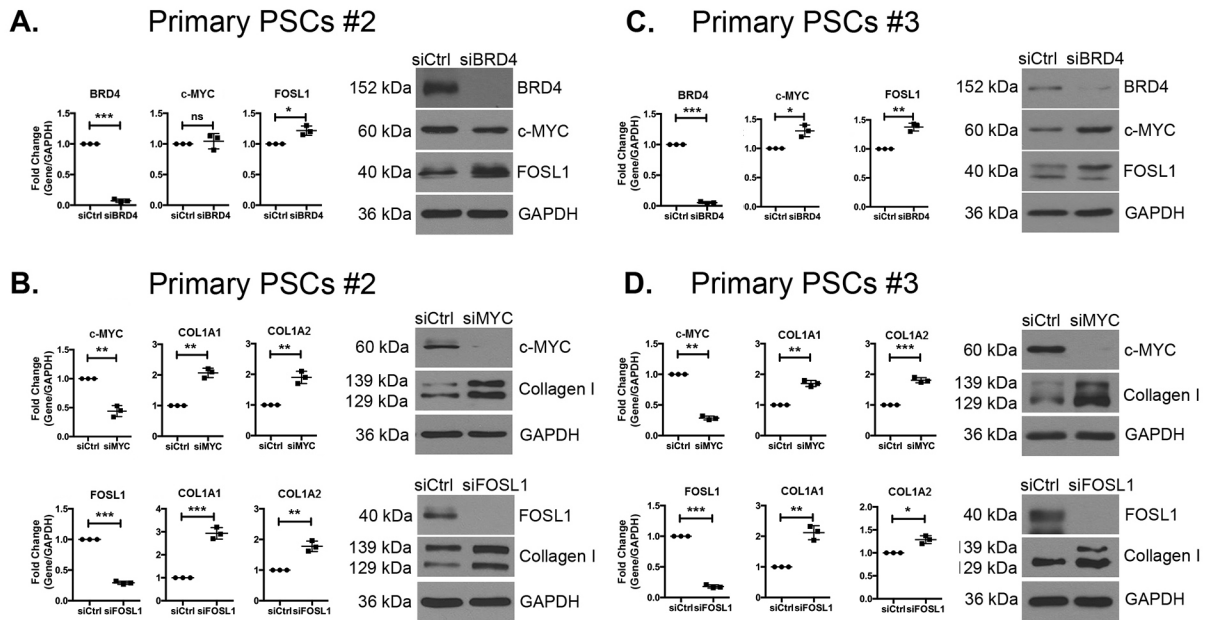

**Supplemental Figure 2: FOSL1 is repressed by BRD4 in stellate cells and negatively regulates collagen I expression.** (A and C) BRD4 was knocked down in primary PSCs isolated from human PDAC tumors (Tumors #2 and #3) and the effects on *c-MYC* and *FOSL1* mRNA were determined by qRT-PCR (n=3). \* $P < 0.05$ , \*\* $P < 0.01$ , \*\*\* $P < 0.001$ , ns, not significant. Data were analyzed by two-tailed unpaired Student's *t* test. The effects on *c-MYC* and *FOSL1* protein expression were determined by Western blotting. These results are representative of three (n=3) independent experiments. (B and D) *c-MYC* and *FOSL1* were individually knocked down in primary cancer-associated PSCs and the effects on *COL1A1* and *COL1A2* mRNA were determined by qRT-PCR (n=3). \* $P < 0.05$ , \*\* $P < 0.01$ , \*\*\* $P < 0.001$ . Data were analyzed by two-tailed unpaired Student's *t* test. The effect on collagen I protein expression was determined by Western blotting. These results are representative of three (n=3) independent experiments. COL, collagen; PSCs, pancreatic stellate cells.
